# Supplementary material
Source: publisher figshare collection journal article supplement (https://acs.figshare.com/ndownloader/files/6516021)
Supplement: Supplementary file 1 [file 6516021]

1 **Supporting Information for “The London Hybrid**  
2 **Exposure Model (LHEM): Improving human exposure**  
3 **estimates to NO<sub>2</sub> and PM<sub>2.5</sub> in an urban setting”**

4  
5 James David Smith<sup>1,2</sup>, Christina Mitsakou<sup>1</sup>, Nutthida Kitwiroon<sup>1,2</sup>, Ben M. Barratt<sup>1,2</sup>, Heather  
6 A Walton<sup>1,2,3</sup>, Jonathon G Taylor<sup>4</sup>, Hugh Ross Anderson<sup>1</sup>, Frank J. Kelly<sup>1,2,3</sup>, Sean D.  
7 Beevers<sup>1,2\*</sup>

- 8
- 9 1. MRC-PHE Centre for Environment and Health – King’s College London
  - 10 2. Environmental Research Group – King’s College London
  - 11 3. NIHR HPRU in Heath Impact of Environmental Hazards Address – King’s College  
12 London
  - 13 4. UCL Institute for Environmental Design and Engineering, University College London
  - 14 5. Population Health Research Institute, St George’s, University of London

15 \*This research was primarily conducted at King’s College London. The corresponding author  
16 can be contacted via email: [sean.beevers@kcl.ac.uk](mailto:sean.beevers@kcl.ac.uk), telephone: +442078484009 or at:  
17 Environmental Research Group, 4<sup>th</sup> Floor, Franklin-Wilkins Building, Stamford Street,  
18 King’s College London, London, SE1 9NH

19

20 Pages: 14

21 Figures: 4

22 Tables: 3

23

## 24 **Contents**

25

|                                                                                                                                                                         |     |
|-------------------------------------------------------------------------------------------------------------------------------------------------------------------------|-----|
| Appendix A. Deriving weighting factors for the London Travel Demand Survey                                                                                              | S3  |
| Appendix B. Illustrative video of the LTDS data & exposure results                                                                                                      | S4  |
| Appendix C. Output from the CMAQ-urban model for Great Britain                                                                                                          | S4  |
| Figure S1. Example NO <sub>2</sub> air pollution predictions from the CMAQ-urban model.                                                                                 | S5  |
| Appendix C1. CMAQ-Urban air quality model evaluation                                                                                                                    | S6  |
| Table S1. Model evaluation statistics for CMAQ-urban predictions                                                                                                        | S6  |
| Figure S2. Modelled vs Observed hour of day average NO <sub>2</sub> (ppb) and PM <sub>2.5</sub> (µg m <sup>-3</sup> )<br>outdoor concentrations at UK monitoring sites. | S7  |
| Appendix D. Indoor/Outdoor ratios                                                                                                                                       | S8  |
| Figure S3. 24 hour average indoor to outdoor ratios (I/O) for NO <sub>2</sub> concentrations at<br>each postcode in London                                              | S8  |
| Appendix E. In-vehicle model assumptions and sensitivity tests                                                                                                          | S9  |
| Table S2. LHEM vehicle characteristics                                                                                                                                  | S10 |
| Appendix F. LHEM exposure relationships                                                                                                                                 | S11 |
| Figure S4. The relationship between the daily mean PM <sub>2.5</sub> vs. NO <sub>2</sub> exposure<br>estimated using the LHEM model, split by normal number of trips    | S11 |
| Appendix G. Microenvironments                                                                                                                                           | S12 |
| Table S3. Concentrations within transport microenvironments                                                                                                             | S12 |
| References                                                                                                                                                              | S13 |

26

27

## 28 **Appendix A. Deriving weighting factors for the London Travel Demand**

### 29 **Survey (LTDS) (Provided by David Wilby, Statistical Analyst, TfL)**

30 The objective of the weighting process is to derive expansion factors, which weight the  
31 LTDS dataset to the Greater London population (see Section 2.1). The weighting process  
32 currently considers the Greater London sample of households, with the top 1% removed to  
33 avoid the influence of outliers. In total 6 weights were derived and added to the final dataset  
34 used in the LHEM model:

35

36 **Household weighting factors:** First a weight was created for each household representing  
37 both the survey's sampling rate and response rate. The next step was to adjust the expansion  
38 factors to give an even distribution of households across the days of the week and then a  
39 weight was created to represent estimates of the household structure by London borough. The  
40 household structure was taken from GLA midyear estimates,  
41 ([https://www.london.gov.uk/sites/default/files/update-04-2015-2014rnd-trend-proj-](https://www.london.gov.uk/sites/default/files/update-04-2015-2014rnd-trend-proj-methodology.pdf)  
42 [methodology.pdf](https://www.london.gov.uk/sites/default/files/update-04-2015-2014rnd-trend-proj-methodology.pdf)) and all weights were provided by TfL as part of the survey output.

43

44 **Person weighting factors:** Building on the capped and rescaled household weights, the  
45 person sample was aggregated by gender and age, and weighted to match population  
46 estimates of gender and age by borough. Analysis was also undertaken to check that the  
47 weighted data reflects the population size and composition in each borough. Both household  
48 and person weights were finally adjusted to account for the effect of school terms.

49

## 50 **Appendix B. Illustrative video of the LTDS data & exposure results**

51 [http://www.londonair.org.uk/Research/lhem\\_pm25\\_animation/](http://www.londonair.org.uk/Research/lhem_pm25_animation/)

## 52 **Appendix C. Output from the CMAQ-urban model for Great Britain**

53 Figure S1 provides a picture of the output, from the CMAQ-urban model, of annual average  
54 NO<sub>2</sub> across Great Britain. The CMAQ model was run hourly for 2011, at 10km x 10km grid  
55 resolution, with the ADMS roads model providing hourly air pollution predictions at 20m x  
56 20m within urban areas and close to major roads between urban areas. Whilst only NO<sub>2</sub> is  
57 provided the model also predicts PM components in three size bins which are combined to  
58 give estimates of PM<sub>2.5</sub> and PM<sub>10</sub> mass, as well as NO<sub>x</sub> and Ozone. Finally, the hourly model  
59 output has been summarised as an average hour of the day for each 20m grid location,  
60 encompassing both the long term nature of the exposure estimates made with LHEM, whilst  
61 recognising the need to account for the time of travel during the day.

62  
63  
64  
65

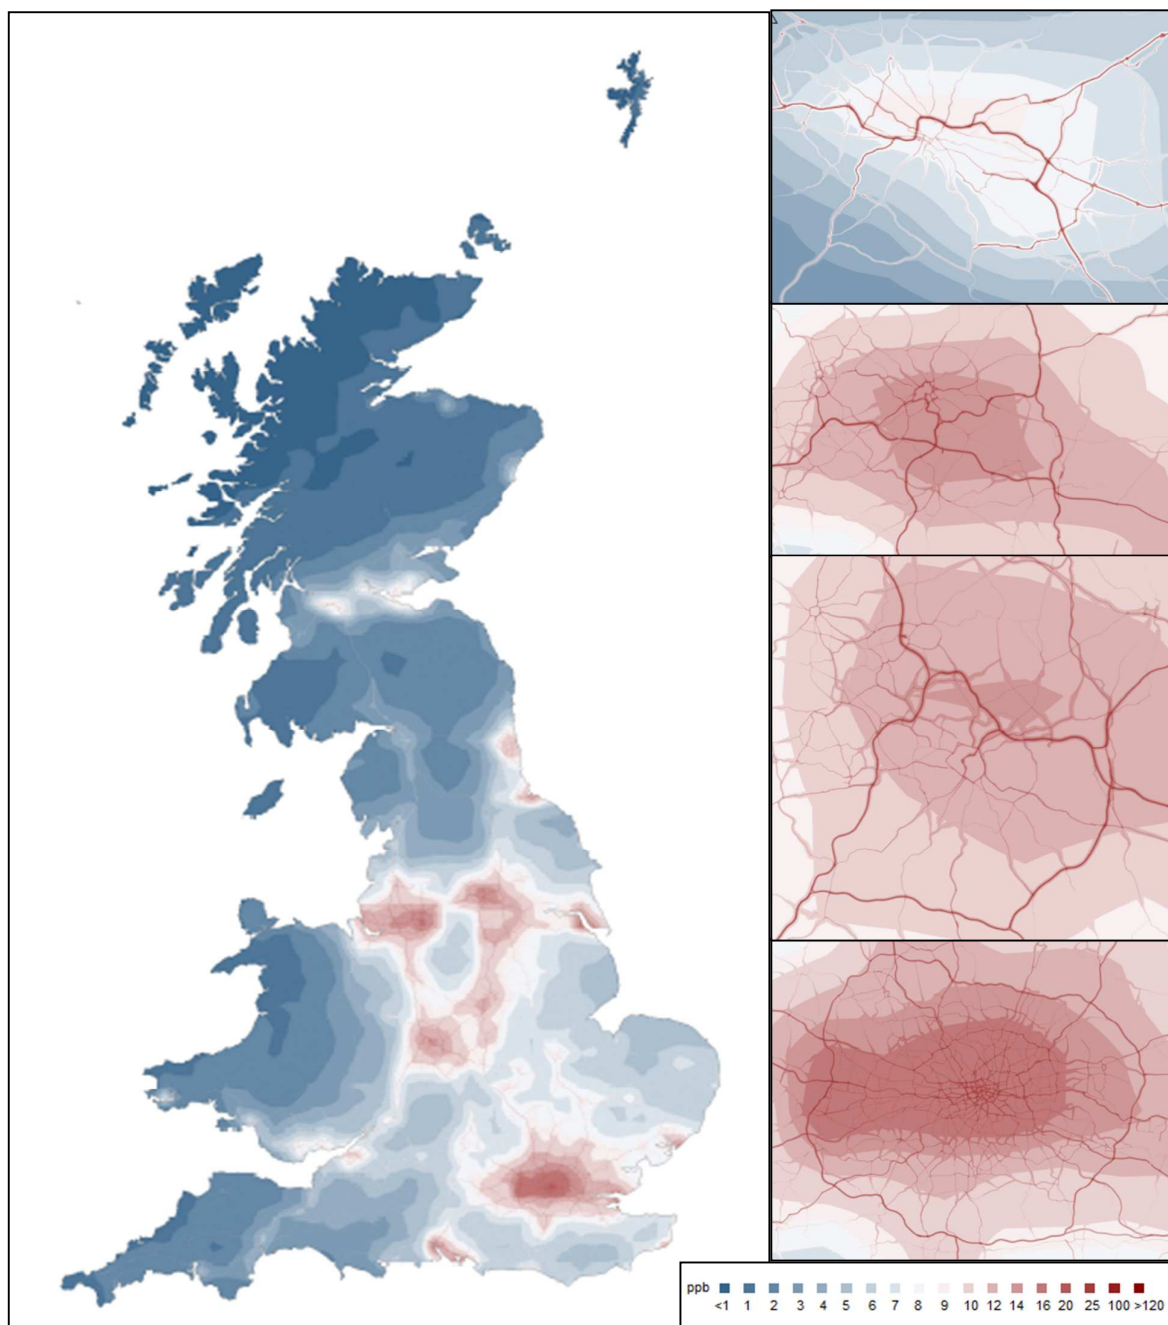

66 Figure S1. Example NO<sub>2</sub> air pollution predictions from the CMAQ-urban model. Within  
67 urban areas and along major roads the CMAQ-urban model predictions are at 20 x 20m grid  
68 resolution. In rural areas the grid resolution is 10 x 10 km.  
69

## Appendix C1. CMAQ-Urban air quality model evaluation

The source of outdoor air quality concentrations in the LHEM is the CMAQ-Urban model, described elsewhere by Beevers et al.<sup>1</sup> and providing average hour of the day outdoor air pollution concentrations throughout Great Britain, the latter being required since individuals often travel beyond London. Here, CMAQ-Urban 2011 annual average NO<sub>2</sub> and PM<sub>2.5</sub> have been evaluated using the protocols described in Derwent et al.<sup>2</sup> against up to 89 monitoring stations across Great Britain (see Table S1). In addition, since human exposure has been estimated by hour of the day, we have also included diurnal profiles for three different measurements site types: roadside, (including kerbside) for sites within 5m of a road, urban background (including suburban) for sites within urban areas but beyond the influence of individual local sources, and rural sites, for those outside urban areas (see Figure S2).

Table S1. Model evaluation statistics for CMAQ-urban predictions of outdoor NO<sub>2</sub> and PM<sub>2.5</sub> concentrations in the UK

| Species           | n  | FAC2 | MB   | MGE | NMB   | NMGE | RMSE | r    |
|-------------------|----|------|------|-----|-------|------|------|------|
| NO <sub>2</sub>   | 89 | 1.00 | 0.5  | 3.7 | 0.03  | 0.18 | 4.9  | 0.90 |
| PM <sub>2.5</sub> | 66 | 1.00 | -1.4 | 2.2 | -0.10 | 0.15 | 2.6  | 0.77 |

The CMAQ-urban model is able to predict NO<sub>2</sub> concentrations well across the UK and with an r value of 0.9, is able to explain 81% of the measured variability. There is a small normalised mean bias (NMB) of 3%, although as seen in Figure S2, the model tends to over predict the diurnal variation of average NO<sub>2</sub>, especially at roadside sites and over predicts rural concentrations throughout the day.

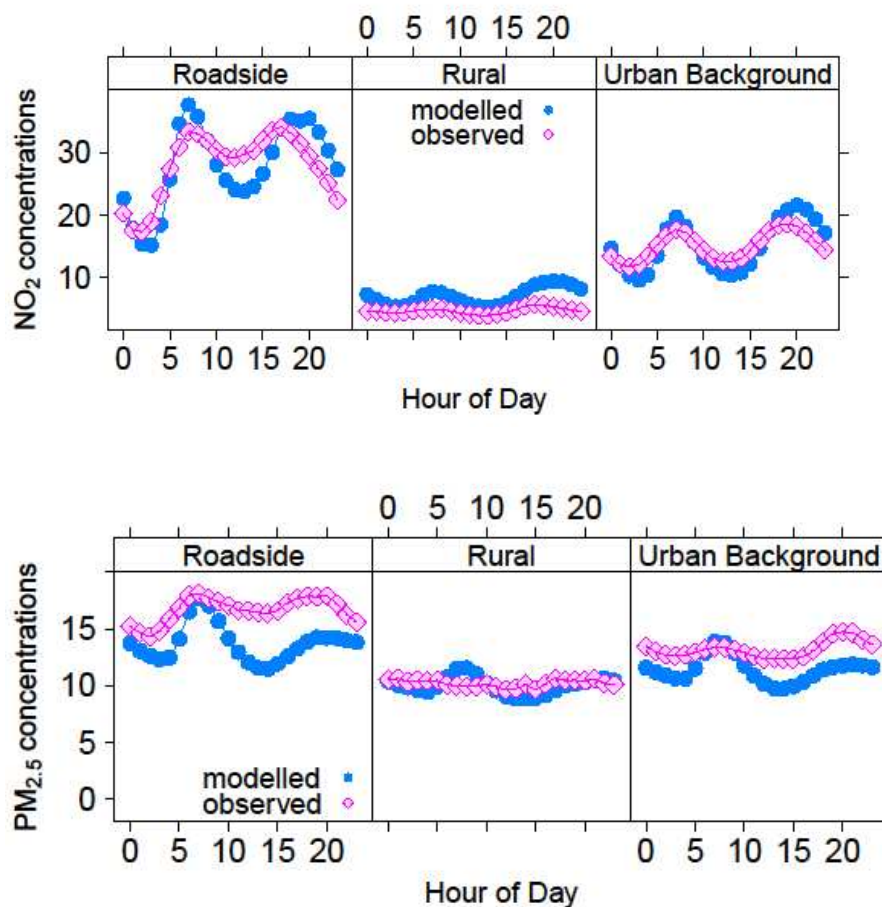

91

92 Figure S2. Modelled vs Observed hour of day average  $\text{NO}_2$  (ppb) and  $\text{PM}_{2.5}$  ( $\mu\text{g m}^{-3}$ ) outdoor  
 93 concentrations at UK monitoring sites.

94

95 Annual average  $\text{PM}_{2.5}$  concentrations are also reasonably well predicted with the r values of  
 96 0.77 and an NMB value of -0.1 (see Table S1) and whilst rural diurnal  $\text{PM}_{2.5}$  concentrations  
 97 are also reasonably well predicted, the model shows a greater diurnal variation in  
 98 concentrations than shown by the measurements. This is particularly the case for roadside  
 99 sites where, despite predicting the early morning peak concentration well, the afternoon and  
 100 evening periods are under-predicted meaning that the exposure impacts of road transport  
 101 modes, walking and cycling will be under-predicted for  $\text{PM}_{2.5}$ .

## Appendix D. Indoor/Outdoor ratios

There are important differences between the postcode-averaged  $\text{PM}_{2.5}$  I/O ratios (Figure 1), which fall within a range of 0.35 to 0.86, and those for  $\text{NO}_2$  (Figure S3), which fall between the range 0.11 to 0.59. The differences are mainly due to the assumptions regarding pollutant behaviour.  $\text{PM}_{2.5}$  was modelled with a deposition rate of  $0.19 \text{ h}^{-1}$  and with a penetration factor of 0.8 when windows were closed and 1.0 when they were open<sup>3</sup>, the latter representing a small fraction of all hours when internal temperatures exceeded a specified threshold. In contrast  $\text{NO}_2$  was modelled with a deposition rate of  $0.87 \text{ h}^{-1}$  and a penetration factor of 1.0 at all times<sup>4</sup>. The lack of penetration factor and higher deposition rate for  $\text{NO}_2$  results in a lower range of estimated I/O ratios than that predicted for  $\text{PM}_{2.5}$ .

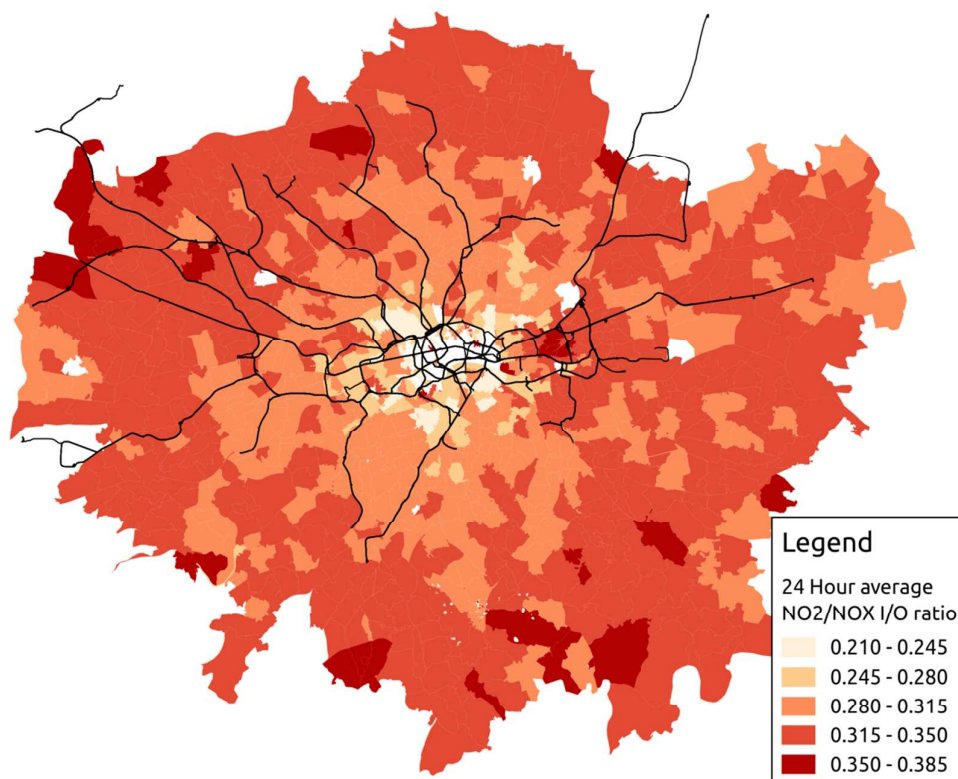

Figure S3. 24 hour average indoor to outdoor ratios (I/O) for  $\text{NO}_2$  concentrations at each postcode in London



## Appendix E. In-vehicle model assumptions and sensitivity tests

Equation 1 within the main manuscript describes a mass balance equation commonly used<sup>5-7</sup> to derive pollutant concentrations in enclosed environments. The mass balance equation is solved analytically. The general solution is given below (Equation 2) where  $b = \lambda_{win} \cdot C_{out} + Q/V$ ,  $a = \lambda_{win} + n\lambda_{HVAC} + V_g(A^*/V)$  and the subscript 0 denotes the initial conditions.

$$C_{in} = \left( C_{in_0} - \frac{b_0}{a_0} \right) \cdot \exp(-a \cdot t) + \frac{b}{a} \quad (1)$$

Values for the characteristics (volumes, surfaces, numbers of people) of each vehicle type (bus, car, train etc.) are used in the in-vehicle exposure module of the LHEM (Table S2). The velocities with which pollutants are deposited on vehicles' surfaces are adopted from the values used in INDAIR model<sup>8</sup> that is  $1.8 \cdot 10^{-4} \text{ ms}^{-1}$  for  $\text{PM}_{2.5}$  and  $1.2 \cdot 10^{-4} \text{ ms}^{-1}$  for  $\text{NO}_2$  in the base case calculations and  $8.6 \cdot 10^{-4} \text{ ms}^{-1}$  for  $\text{PM}_{2.5}$  and  $2.4 \cdot 10^{-4} \text{ ms}^{-1}$  for  $\text{NO}_2$  in the sensitivity test run number 4.

The air exchange rates for cars/taxis are taken from published studies<sup>9,10</sup> and assume semi-opened windows, with the air-conditioning off, resulting in values of  $2.8 \text{ h}^{-1}$  while stationary and  $30.3 \text{ h}^{-1}$  during the journey. The air exchange rates used for buses and coaches between stops was taken as  $1.25 \text{ h}^{-1}$ , and at stops was  $24 \text{ h}^{-1}$ . These are similar to other in-vehicle studies<sup>6</sup>. In the case of train trips, an average air exchange rate of  $5.2 \text{ h}^{-1}$  was assumed through the mechanical ventilation system<sup>11</sup> between stops, and  $10 \text{ h}^{-1}$  at stops (to reflect door opening). For simplicity, the number of people between two stops and active passengers at each stop is assumed constant throughout a journey (Table S2).

136 The re-suspension rates per person for PM<sub>2.5</sub> has been adopted from current literature<sup>12</sup>, and  
 137 for people walking indoors was assumed to be 0.71 and 1200 µg ac.no<sup>-1</sup> h<sup>-1</sup> whilst moving  
 138 and at stops.

139 Table S2. LHEM vehicle characteristics.

| Transport mode   | Area (m <sup>2</sup> )/<br>Volume (m <sup>3</sup> )<br>(per<br>car/coach) | Number of<br>passengers/ active<br>people<br>(per car/coach) | Number of passengers/<br>active people for sensitivity<br>test 3<br>(per car/coach) |
|------------------|---------------------------------------------------------------------------|--------------------------------------------------------------|-------------------------------------------------------------------------------------|
| Car/van/taxi     | 0.7/2.5                                                                   | -                                                            | -                                                                                   |
| Coach/school bus | 30/66                                                                     | 50/0                                                         | 50/0                                                                                |
| Dial a ride      | 7.7/15.5                                                                  | 30/0                                                         | 30/0                                                                                |
| Public bus       | 57/105                                                                    | 50/10                                                        | 87/20                                                                               |
| Train            | 62/224                                                                    | 40/10                                                        | 40/20                                                                               |
| DLR              | 74/260                                                                    | 70/30                                                        | 140/60                                                                              |
| Tram             | 17/60                                                                     | 30/10                                                        | 30/10                                                                               |

140

141

**Appendix F. LHEM exposure relationships**

It is important to understand whether the journeys undertaken in the LTDS survey are part of people's daily routine or are unusual, for example, going on holiday, and whether this effects the pollutant correlation discussed in Section 3.3. To do this the LHEM exposure scatter plots in Figure 4 of the main manuscript have been split by whether individuals took 'fewer' (pink), 'more' (cyan) or a their 'usual' (purple) number of journeys in a day (Figure S4), with the 'missing' (green) category included, where there was no response to this question. For the times that this question was answered, all show similar relationships to that of the right panel of Figure 4 in the main manuscript.

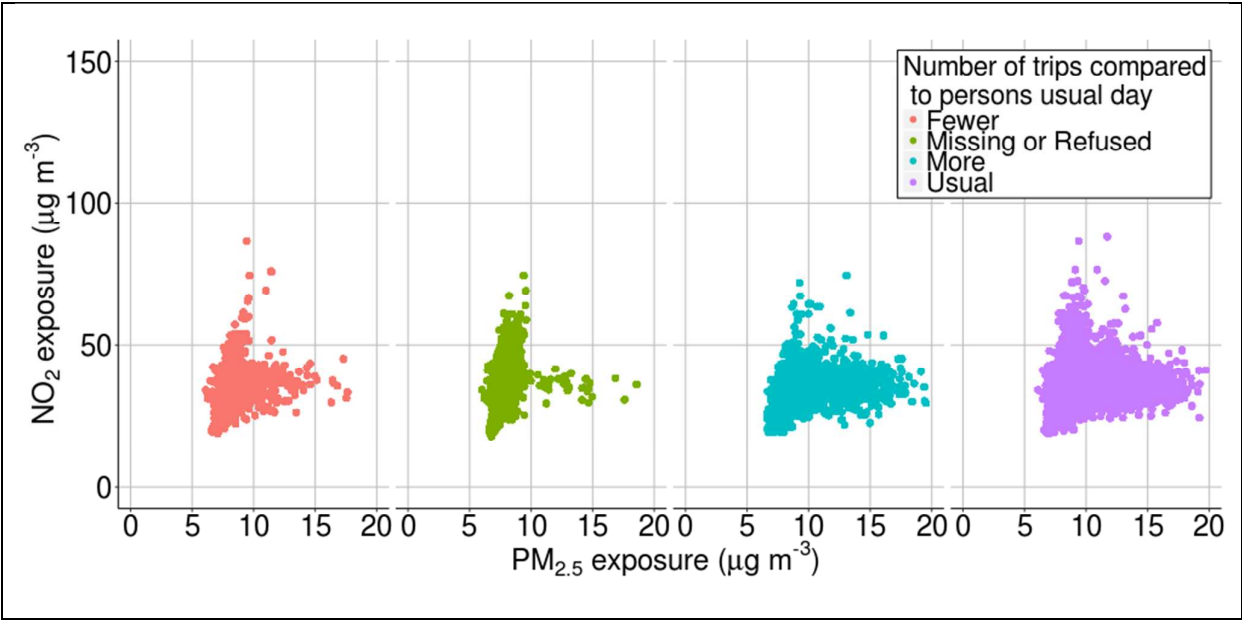

Figure S4. The relationship between the daily mean PM<sub>2.5</sub> vs. NO<sub>2</sub> exposure estimated using the LHEM model, split by normal number of trips

**Appendix G. Microenvironments**

Mean concentrations (and range) for each microenvironment output from CMAQ-Urban, the I/O ratios, and the in-vehicle model.

Table S3. Concentrations within microenvironments

| Microenvironment  | PM <sub>2.5</sub> (µg m <sup>-3</sup> ) (mean, range) | NO <sub>2</sub> (µg m <sup>-3</sup> ) (mean, range) |
|-------------------|-------------------------------------------------------|-----------------------------------------------------|
| Walk              | 13.7 (6.4 – 40.5)                                     | 44.8 (2.9 – 372.1)                                  |
| Cycle             | 15.1 (9.2 – 38.3)                                     | 55.3 (12.6 – 298)                                   |
| Motorcycle        | 16.9 (9.1 – 43.0)                                     | 75.0 (11.4 – 348)                                   |
| Driving           | 14.6 (6.0 – 53.7)                                     | 57.2 (1.8 - 404)                                    |
| Bus               | 14.5 (5.0 – 44.0)                                     | 58.2 (7.8 - 364)                                    |
| Underground & DLR | 91.5 (5.3-94.0)                                       | 57.6 (9.3 – 261)                                    |
| Train             | 13.5 (5.6 – 33.4)                                     | 40.4 (2.6 – 252.7)                                  |
| Indoor            | 7.9 (3.1 – 26.0)                                      | 10.9 (0.5 – 75.4)                                   |
| Outdoor           | 13.6 (5.9 – 54.0)                                     | 35.7 (2.0 – 406.0)                                  |

## References

1. Beevers, S. D., Kitwiroon, N., Williams, M. L. & Carslaw, D. C. One way coupling of CMAQ and a road source dispersion model for fine scale air pollution predictions. *Atmos. Environ.* (1994). **59**, 47–58 (2012).
2. Derwent, D. Evaluating the Performance of Air Quality Models. *Pollut. Res.* (2010).
3. Taylor, J., Shrubsole, C., Davies, M., Biddulph, P., Das, P., Hamilton, I., Vardoulakis, S., Mavrogianni, a, Jones, B. & Oikonomou, E. The modifying effect of the building envelope on population exposure to PM<sub>2.5</sub> from outdoor sources. *Indoor Air* 1–13 (2014). doi:10.1111/ina.12116
4. Emmerich, S. & Persily, A. Multizone modeling of three residential indoor air quality control options. *Natl. Inst. Stand. Technol. Build. Fire Res. Lab.* (1996).
5. Schneider, T., Alstrup Jensen, K., Clausen, P. A., Afshari, A., Gunnarsen, L., Wåhlin, P., Glasius, M., Palmgren, F., Nielsen, O. J. & Fogh, C. L. Prediction of indoor concentration of 0.5–4µm particles of outdoor origin in an uninhabited apartment. *Atmos. Environ.* **38**, 6349–6359 (2004).
6. Song, W. W., Ashmore, M. R. & Terry, A. C. The influence of passenger activities on exposure to particles inside buses. *Atmos. Environ.* **43**, 6271–6278 (2009).
7. Halios, C. H., Assimakopoulos, M. N., Chrisafis, D. S. S. & Santamouris, M. Studying the effect of indoor sources and ventilation on the concentrations of particulates in dining halls. *Int. J. Vent.* **8**, 359–369 (2010).
8. Dimitroulopoulou, C., Ashmore, M. R., Hill, M. T. R., Byrne, M. A. & Kinnersley, R. INDAIR: A probabilistic model of indoor air pollution in UK homes. *Atmos. Environ.* **40**, 6362–6379 (2006).
9. Ott, W., Klepeis, N. & Switzer, P. Air change rates of motor vehicles and in-vehicle pollutant concentrations from secondhand smoke. *J. Expos. Sci. Environ. Epidemiol.*

- 188           **18**, 312–25 (2008).
- 189    10.   Liu, X. & Frey, H. C. Modeling of in-vehicle human exposure to ambient fine  
190           particulate matter. *Atmos. Environ.* **45**, 4745–4752 (2011).
- 191    11.   Jegal, K. & Kim, D. Ventilation and Risk Control of the Young Dong Rail Tunnel in  
192           Korea. in *First International Conference on Major Tunnel and Infrastructure Projects*,  
193           *Taipei* 22–24 (2000).
- 194    12.   Ferro, A. R., Kopperud, R. J. & Hildemann, L. M. Source Strengths for Indoor Human  
195           Activities that Resuspend Particulate Matter. *Environ. Sci. Technol.* **38**, 1759–1764  
196           (2004).
- 197
